# Supplementary material for: Controversies in the Surgical Treatment of Chronic Subdural Hematoma: A Systematic Scoping Review
Source: MDPI journal article supplement (doi:10.3390/diagnostics12092060), 2022-08-25
Supplement: s1 [file s1]

**Supplementary Table S1.** “Levels of evidence and grades of recommendation, modified from Weigel et al. [5].”

| LEVEL OF EVIDENCE       | EXPLANATION                                                                                                              |                                                                                                                       |
|-------------------------|--------------------------------------------------------------------------------------------------------------------------|-----------------------------------------------------------------------------------------------------------------------|
| LEVEL I                 | Evidence provided by one or more well designed RCTs.                                                                     |                                                                                                                       |
| LEVEL II                | Evidence provided by one or more well designed clinical studies such as prospective studies, case-control studies, etc.. |                                                                                                                       |
| LEVEL III               | Evidence provided by non-randomized retrospective studies, case series, case reports and expert opinion.                 |                                                                                                                       |
| GRADE OF RECOMMENDATION | STRENGTH                                                                                                                 | TRANSLATION IN PRACTICE                                                                                               |
| GRADE I                 | Strong recommendation based on class I evidence or consistent level II evidence.                                         | Clinicians should follow the recommendation unless a clear and compelling rationale for an attentive approach exists. |
| GRADE II                | Moderate recommendation based on level II evidence.                                                                      | Clinicians should follow the recommendation but should remain sensitive to new information and patient’s preference.  |
| GRADE III               | Weak recommendation based on level II evidence.                                                                          | Clinicians should remain flexible but take into consideration experts opinion. Precision on a case-by-case basis.     |
